# Supplementary material for: Proteomic profiling and genome-wide mapping of O-GlcNAc chromatin-associated proteins reveal an O-GlcNAc-regulated genotoxic stress response
Source: PubMed Central journal article supplement (PMC7678849; doi:10.1038/s41467-020-19579-y), 2020-11-19
Supplement: 41467_2020_19579_MOESM20_ESM.pdf [file 41467_2020_19579_MOESM20_ESM.pdf]

## Reporting Summary

Nature Research wishes to improve the reproducibility of the work that we publish. This form provides structure for consistency and transparency in reporting. For further information on Nature Research policies, see [Authors & Referees](#) and the [Editorial Policy Checklist](#).

### Statistics

For all statistical analyses, confirm that the following items are present in the figure legend, table legend, main text, or Methods section.

n/a Confirmed

- The exact sample size ( $n$ ) for each experimental group/condition, given as a discrete number and unit of measurement
- A statement on whether measurements were taken from distinct samples or whether the same sample was measured repeatedly
- The statistical test(s) used AND whether they are one- or two-sided  
*Only common tests should be described solely by name; describe more complex techniques in the Methods section.*
- A description of all covariates tested
- A description of any assumptions or corrections, such as tests of normality and adjustment for multiple comparisons
- A full description of the statistical parameters including central tendency (e.g. means) or other basic estimates (e.g. regression coefficient) AND variation (e.g. standard deviation) or associated estimates of uncertainty (e.g. confidence intervals)
- For null hypothesis testing, the test statistic (e.g.  $F$ ,  $t$ ,  $r$ ) with confidence intervals, effect sizes, degrees of freedom and  $P$  value noted  
*Give  $P$  values as exact values whenever suitable.*
- For Bayesian analysis, information on the choice of priors and Markov chain Monte Carlo settings
- For hierarchical and complex designs, identification of the appropriate level for tests and full reporting of outcomes
- Estimates of effect sizes (e.g. Cohen's  $d$ , Pearson's  $r$ ), indicating how they were calculated

*Our web collection on [statistics for biologists](#) contains articles on many of the points above.*

### Software and code

Policy information about [availability of computer code](#)

#### Data collection

No samples were excluded for any analysis.  
The absorbance was collected using Gen5 software (v5.0).  
For qPCR, data were collected with Multiplate RQ software (v1.00).  
For western blotting, images were collected with AlphaView software v2.10 (Protein Sample).  
For LC-MS/MS analysis, raw data were collected using Xcalibur software (v2.0.57).  
For next generation sequencing, raw reads were collected using BGISEQ-500 software (v 0.3.8.1).

#### Data analysis

In general, results presented as mean  $\pm$  SEM were collected and calculated using Microsoft Excel 2019 and GraphPad Prism (v8.0).  
COGC-seq, ChIP-seq and RNA-seq base calling was conducted using BGISEQ-500 software (v0.3.8.1) BGISEQ-500 software (v 0.3.8.1).  
For next generation sequencing, The raw datasets were analyzed using FastQC (v 0.11.8), Samtools (v 1.2), Bowtie2 (v 2.3.4.3), Bedtools (v2.27.1), MACS (v 2.1.1), Integrative Genomics Viewer (IGV; v2.3.4), deeptools (v 3.3.2.0.0), Metascape (v 3.0), Cytoscape (v 3.6.1), MEME (v 5.0.1), DiffBind (v 2.10.0), MAnorm (v 1.2.0), Homer (v 4.11), SOAPnuke (v 2.1.0), HISAT2 (v 2.1.0), RSEM (v 1.2.4), ChIPseeker (v 1.18.0); DESeq2 (v 1.18.1).  
For LC-MS/MS analysis, MaxQuant (v 1.5.3.28), STRING software (v 11.0), Metascape software (v 3.0) were used.  
Other bioinformatic analyses were performed using the phyper function in the R software package (v3.4.3), R-package: beanplot (v 1.2), R-package: ggplot2 (v 3.0.0), R-package: igraph (v 1.2.1), R-package: venneuler (v 1.1-0).

For manuscripts utilizing custom algorithms or software that are central to the research but not yet described in published literature, software must be made available to editors/reviewers. We strongly encourage code deposition in a community repository (e.g. GitHub). See the Nature Research [guidelines for submitting code & software](#) for further information.

## Data

Policy information about [availability of data](#)

All manuscripts must include a [data availability statement](#). This statement should provide the following information, where applicable:

- Accession codes, unique identifiers, or web links for publicly available datasets
- A list of figures that have associated raw data
- A description of any restrictions on data availability

The raw data of COGC-seq, NRF1 ChIP-seq and RNA-seq is available in the Gene Expression Omnibus database under the accession number GSE141698 [<https://www.ncbi.nlm.nih.gov/geo/query/acc.cgi?acc=GSE141698>].

The raw mass spectral data in our study is available via iProX with identifier PXD016713 [<https://www.iprox.org/page/project.html?id=IPX0001893000>].

The other published ChIP-seq and other sequencing raw data used in this study is available in the Gene Expression Omnibus database: MCF-7 cells ChIP-seq H3K27ac, H3K4me3 (GSE97481, [<https://www.ncbi.nlm.nih.gov/geo/query/acc.cgi?acc=GSE97481>]), H3K27me3 (GSE96363, [<https://www.ncbi.nlm.nih.gov/geo/query/acc.cgi?acc=GSE96363>]) and H3K4me1 (GSE86714, [<https://www.ncbi.nlm.nih.gov/geo/query/acc.cgi?acc=GSE86714>]), HCF-1 (GSE91992 [<https://www.ncbi.nlm.nih.gov/geo/query/acc.cgi?acc=GSE91992>]), SP1 (GSE92014, [<https://www.ncbi.nlm.nih.gov/geo/query/acc.cgi?acc=GSE92014>]), NRF1 (GSE91522, [<https://www.ncbi.nlm.nih.gov/geo/query/acc.cgi?acc=GSE91522>]), HEK293 cells OGT, O-GlcNAc ChIP-seq (GSE36620 [<https://www.ncbi.nlm.nih.gov/geo/query/acc.cgi?acc=GSE36620>]), BJAB cells O-GlcNAc ChIP-seq (GSE86154 [<https://www.ncbi.nlm.nih.gov/geo/query/acc.cgi?acc=GSE86154>]), MCF-7 cells RNA-Pol II ChIP-seq (GSE34001 [<https://www.ncbi.nlm.nih.gov/geo/query/acc.cgi?acc=GSE34001>]) and MCF-7 GRO-seq (GSE96859 [<https://www.ncbi.nlm.nih.gov/geo/query/acc.cgi?acc=GSE96859>]).

The raw data underlying Figure 1b-c, 2a, 4e, 5c, 5e-f, 6a, 6d-i, 7d, 8a-d, as well as Supplementary Figure 1a-b, 1d, 2, 3, 4, 6c, 7e, 9a, 11a, 12a-b, 13a-c, 14b, 15a, 16a, 17a-e, 19, 20, 21a-e are available in the Source Data file. All other data supporting the findings of this study are available from the corresponding authors upon reasonable request.

## Field-specific reporting

Please select the one below that is the best fit for your research. If you are not sure, read the appropriate sections before making your selection.

Life sciences  Behavioural & social sciences  Ecological, evolutionary & environmental sciences

For a reference copy of the document with all sections, see [nature.com/documents/nr-reporting-summary-flat.pdf](https://www.nature.com/documents/nr-reporting-summary-flat.pdf)

## Life sciences study design

All studies must disclose on these points even when the disclosure is negative.

|                 |                                                                                                                                                                                                                                                                                                                                                                                                                                                                                                                                                                                                                                                                                                                                             |
|-----------------|---------------------------------------------------------------------------------------------------------------------------------------------------------------------------------------------------------------------------------------------------------------------------------------------------------------------------------------------------------------------------------------------------------------------------------------------------------------------------------------------------------------------------------------------------------------------------------------------------------------------------------------------------------------------------------------------------------------------------------------------|
| Sample size     | We did not perform any patient or in-vivo analysis as all data was generated using cell-culture standards. No statistical method was used to predetermine sample size. Because it is not a population study and the important issue is that the biological samples are stress adapted for comparison, not the sample size. n = 3 biologically independent experiments were used this study. This information is provided in all figure legends.                                                                                                                                                                                                                                                                                             |
| Data exclusions | No data were excluded from these assays.                                                                                                                                                                                                                                                                                                                                                                                                                                                                                                                                                                                                                                                                                                    |
| Replication     | Experiments were performed at minimum of two times. Two biologically independent replicates were performed in COGC-seq, ChIP-seq and RNA-seq experiments. sWGA lectin ChIP-seq was performed once. Nine biological replicates of the proteomic analysis were performed. The crystal violet staining results were reproduced in two biologically independent experiments. Other experiments were performed at least three times (biological replicates) to obtain statistical significance. Experiments were repeated independently two times with similar results. All blots are representative of at least two biologically independent experiments. This information is provided in all figure legends. All replications were successful. |
| Randomization   | Our study did not involve patients and therefore we did not use trial and treatment groups for the analysis.                                                                                                                                                                                                                                                                                                                                                                                                                                                                                                                                                                                                                                |
| Blinding        | Our study did not involve patients and therefore blinding trials were not used. The investigators were blinded to RNA-seq, ChIP-seq, COGC-seq and LC-MS/MS analysis, and all other data collection and/or analysis.                                                                                                                                                                                                                                                                                                                                                                                                                                                                                                                         |

## Reporting for specific materials, systems and methods

We require information from authors about some types of materials, experimental systems and methods used in many studies. Here, indicate whether each material, system or method listed is relevant to your study. If you are not sure if a list item applies to your research, read the appropriate section before selecting a response.

## Materials &amp; experimental systems

| n/a                                 | Involved in the study                                     |
|-------------------------------------|-----------------------------------------------------------|
| <input type="checkbox"/>            | <input checked="" type="checkbox"/> Antibodies            |
| <input type="checkbox"/>            | <input checked="" type="checkbox"/> Eukaryotic cell lines |
| <input checked="" type="checkbox"/> | <input type="checkbox"/> Palaeontology                    |
| <input checked="" type="checkbox"/> | <input type="checkbox"/> Animals and other organisms      |
| <input checked="" type="checkbox"/> | <input type="checkbox"/> Human research participants      |
| <input checked="" type="checkbox"/> | <input type="checkbox"/> Clinical data                    |

## Methods

| n/a                                 | Involved in the study                           |
|-------------------------------------|-------------------------------------------------|
| <input type="checkbox"/>            | <input checked="" type="checkbox"/> ChIP-seq    |
| <input checked="" type="checkbox"/> | <input type="checkbox"/> Flow cytometry         |
| <input checked="" type="checkbox"/> | <input type="checkbox"/> MRI-based neuroimaging |

## Antibodies

## Antibodies used

For western blot or lectin blot:

The primary antibodies used were anti-O-GlcNAc CTD110.6 (BioLegend, #838004, 1:1,000), anti-O-GlcNAc RL2 (Abcam, #ab93858, 1:1,000), anti-SP1 (Abcam, #ab13370, 1:1,000), anti-KLF5 (CST, #51586, 1:1,000), anti-NFKB1 (CST, #13586, 1:1,000), anti-JUN (Proteintech, #24909-1-AP, 1:500), anti-NRF1 (CST, #46743, 1:1,000), anti-OGT (Proteintech, #11576-2-AP, 1:1,000), anti-GAPDH (CST, #5174, 1:1,000), anti-HCF-1 (CST, #50708, 1:1,000), anti-Flag (CST, #14793, 1:1,000), anti-Histone 3 (CST, #4499, 1:1,000), anti-NSMCE2 (Abcam, #ab241564, 1:1,000), anti-Ubi (Abcam, #ab134953, 1:2,000). Lectin sWGA (Vector Laboratories, #B-1025S, 1:2,000) was used for lectin blotting. The appropriate secondary antibody used were anti-mouse IgG-HRP (CST, #7076, 1:20,000), anti-rabbit IgG-HRP (CST, #7074, 1:20,000), anti-mouse IgM-HRP (Abcam, #ab97230, 1:20,000), Streptavidin-HRP (CST, #3999, 1:50,000).

For co-immunoprecipitation:

The antibodies and beads used for IP were anti-SP1 (Abcam, #ab13370, 1:100), anti-KLF5 (CST, #51586, 1:100), anti-JUN (Proteintech, #24909-1-AP, 1:50), anti-NRF1 (CST, #46743, 1:100), and anti-Flag-magnetic beads (Bimake, # B26102). Non-immune IgG (#sc-2027, Santa Cruz), anti-SP1 (Abcam, #ab13370, 1:10), anti-KLF5 (CST, #51586, 1:10), anti-NRF1 (CST, #46743, 1:10) and anti-Flag-magnetic beads (Bimake, 100  $\mu$ L) were used for ChIP. Streptavidin-magnetic beads (BEAVER Life Science, #22308-10) was used for COGC-seq. sWGA-agarose beads (Vector Laboratories, #AL-1023S) was used for sWGA lectin ChIP-seq.

## Validation

Commercially available antibodies used were validated by their respective manufactures' catalogue files to be compatible.

anti-O-GlcNAc CTD110.6 (BioLegend, #838004, 1:1,000, western blot): validation data provided by the supplier (<https://www.biolegend.com/en-us/products/purified-anti-o-glcnac-antibody-13607>) and also characterized in detail in Dias WB, et al. 2009. J. Biol. Chem. 32:21327.

anti-O-GlcNAc RL2 (Abcam, #ab93858, 1:1,000, western blot): validation data provided by the supplier (<https://www.abcam.cn/rl2-antibody-ab93858.html>) and also characterized in detail in Han C, et al. 2017, Nat Commun 8:1491.

anti-SP1 (Abcam, #ab13370, 1:1,000 for western blot, 1:100 for co-immunoprecipitation, 1:10 for ChIP): validation data provided by the supplier (<https://www.abcam.cn/sp1-antibody-ab13370.html>) and validated in our lab by siRNA knockdown.

anti-KLF5 (CST, #51586, 1:1,000 for western blot, 1:100 for co-immunoprecipitation, 1:10 for ChIP): validation data provided by the supplier (<https://www.cellsignal.cn/products/primary-antibodies/klf5-d7s3f-rabbit-mab/51586?N=4294956287&Ntt=%2351586&fromPage=plp>) and validated in our lab by siRNA knockdown.

anti-NFKB1 (CST, #13586, 1:1,000, western blot): validation data provided by the supplier (<https://www.cellsignal.cn/products/primary-antibodies/nf-kb1-p105-p50-d4p4d-rabbit-mab/13586?N=4294956287&Ntt=%2313586&fromPage=plp>) and also characterized in detail in Orian, A. et al. 2000, EMBO J 19, 2580-91.

anti-JUN (Proteintech, #24909-1-AP, 1:500 for western blot, 1:50 for co-immunoprecipitation): validation data provided by the supplier (<https://www.ptgcn.com/Products/JUN-Antibody-24909-1-AP.htm>).

anti-NRF1 (CST, #46743, 1:1,000 for western blot, 1:100 for co-immunoprecipitation, 1:10 for ChIP): validation data provided by the supplier (<https://www.cellsignal.cn/products/primary-antibodies/nrf1-d9k6p-rabbit-mab/46743?N=4294956287&Ntt=%2346743&fromPage=plp>) and validated in our lab by shRNA knockdown.

anti-OGT (Proteintech, #11576-2-AP, 1:1,000, western blot): validation data provided by the supplier (<https://www.ptgcn.com/Products/OGT-Antibody-11576-2-AP.htm>).

anti-GAPDH (CST, #5174, 1:1,000, western blot): validation data provided by the supplier (<https://www.cellsignal.cn/products/primary-antibodies/gapdh-d16h11-xp-rabbit-mab/5174?N=4294956287&Ntt=%235174&fromPage=plp>) and also characterized in detail in Zheng, L. et al. 2003, Cell 114, 255-66.

anti-HCF-1 (CST, #50708, 1:1,000, western blot): validation data provided by the supplier (<https://www.cellsignal.cn/products/primary-antibodies/hcfc1-antibody-carboxy-terminal-antigen/50708?N=4294956287&Ntt=%2350708&fromPage=plp>) and also characterized in detail in Lazarus, M.B. et al. 2013, Science 342, 1235-9.

anti-Flag (CST, #14793, 1:1,000, western blot): validation data provided by the supplier (<https://www.cellsignal.cn/products/primary-antibodies/dykdddk-tag-d6w5b-rabbit-mab-binds-to-same-epitope-as-sigma-s-anti-flag-m2-antibody/14793?N=4294956287&Ntt=%2314793&fromPage=plp>).

anti-Histone 3 (CST, #4499, 1:1,000, western blot): validation data provided by the supplier (<https://www.cellsignal.cn/products/primary-antibodies/histone-h3-d1h2-xp-rabbit-mab/4499?N=4294956287&Ntt=%234499&fromPage=plp>) and also characterized in detail in Dai J et al. 2005, Genes Dev 19, 472-88.

anti-NSMCE2 (Abcam, #ab241564, 1:1,000, western blot): validation data provided by the supplier (<https://www.abcam.cn/mms21-antibody-215c-ab241564.html>) and validated in our lab by siRNA knockdown.

anti-Ubi (Abcam, #ab134953, 1:2,000, western blot): validation data provided by the supplier (<https://www.abcam.cn/ubiquitin-antibody-epr8830-ab134953.html>) and also characterized in detail in Lynch JM et al. 2018, J Biol Chem 293:20137-20156.

Lectin sWGA (Vector Laboratories, #B-1025S, 1:2,000, lectin blot): validation data provided by the supplier (<https://vectorlabs.com/biotinylated-succinylated-wheat-germ-agglutinin-wga.html>).

The availability of Streptavidin-magnetic beads (BEAVER Life Science, #22308-10) and sWGA-agarose beads (Vector Laboratories, #AL-1023S) were confirmed in a previous report (Liu et al., Nature Chemical Biology 2017, 13(2): 161-167). To further validate Streptavidin-magnetic beads and sWGA-agarose beads for ChIP-seq-like experiments, we performed immunoprecipitation of formaldehyde cross-linked cells that with/without O-GlcNAc inhibitor L01, followed by western blot.

## Eukaryotic cell lines

Policy information about [cell lines](#)

### Cell line source(s)

MCF-7, MDA-MB-231, K562, HCT-15 and HEK 293T (293T) cells were obtained from Type Culture Collection of the Chinese Academy of Sciences (Shanghai, China) and were used within 6 months from resuscitation. Adm (Adriamycin) or Fu (Fluorouracil) was added to cell cultures in stepwise increasing concentrations from 0.1 to 10  $\mu$ M for 4 months to develop an ADR or FU subline, namely MCF-7/ADR, K562/ADR and HCT-15/FU, correspondingly.

### Authentication

All cell lines used were STR tested for identity.

### Mycoplasma contamination

All cells were routinely tested for mycoplasma and confirmed negative.

### Commonly misidentified lines (See [ICLAC](#) register)

No commonly misidentified cell lines were used in this study.

## ChIP-seq

### Data deposition

- Confirm that both raw and final processed data have been deposited in a public database such as [GEO](#).
- Confirm that you have deposited or provided access to graph files (e.g. BED files) for the called peaks.

### Data access links

*May remain private before publication.*

GEO accession number for data generated in this study is GSE141698.

Link:

<https://www.ncbi.nlm.nih.gov/geo/query/acc.cgi?acc=GSE141698>

### Files in database submission

| GSM No.    | processed data file                      | raw file                                 |
|------------|------------------------------------------|------------------------------------------|
| GSM4211228 | COGC-seq_ADR_Input_R1.bw                 | COGC-seq_ADR_Input_R1.fq                 |
| GSM4211229 | COGC-seq_ADR_Input_R2.bw                 | COGC-seq_ADR_Input_R2.fq                 |
| GSM4211230 | COGC-seq_MCF-7_Input_R1.bw               | COGC-seq_MCF-7_Input_R1.fq               |
| GSM4211231 | COGC-seq_MCF-7_Input_R2.bw               | COGC-seq_MCF-7_Input_R2.fq               |
| GSM4211232 | COGC-seq_ADR_R1.bw                       | COGC-seq_ADR_R1.fq                       |
| GSM4211233 | COGC-seq_ADR_R2.bw                       | COGC-seq_ADR_R2.fq                       |
| GSM4211234 | COGC-seq_MCF-7_R1.bw                     | COGC-seq-MCF-7_R1.fq                     |
| GSM4211235 | COGC-seq_MCF-7_R2.bw                     | COGC-seq-MCF-7_R2.fq                     |
| GSM4211236 | sWGA_ADR_Input.bw                        | sWGA_ADR_Input.fq                        |
| GSM4211237 | sWGA_MCF-7_Input.bw                      | sWGA_MCF-7_Input.fq                      |
| GSM4211238 | sWGA_ADR_IP.bw                           | sWGA_ADR.fq                              |
| GSM4211239 | sWGA_MCF-7_IP.bw                         | sWGA_MCF-7.fq                            |
| GSM4766285 | ChIP-seq_ADR_Flag-AA-NRF-1_R1.bw         | ChIP-seq_ADR_Flag-AA-NRF-1_R1.fq         |
| GSM4766286 | ChIP-seq_ADR_Flag-AA-NRF-1_R2.bw         | ChIP-seq_ADR_Flag-AA-NRF-1_R2.fq         |
| GSM4766287 | ChIP-seq_ADR_Flag-WT-NRF-1_R1.bw         | ChIP-seq_ADR_Flag-WT-NRF-1_R1.fq         |
| GSM4766288 | ChIP-seq_ADR_Flag-WT-NRF-1_R2.bw         | ChIP-seq_ADR_Flag-WT-NRF-1_R2.fq         |
| GSM4766289 | ChIP-seq_ADR_input_Flag-AA-NRF-1_R1.bw   | ChIP-seq_ADR_input_Flag-AA-NRF-1_R1.fq   |
| GSM4766290 | ChIP-seq_ADR_input_Flag-AA-NRF-1_R2.bw   | ChIP-seq_ADR_input_Flag-AA-NRF-1_R2.fq   |
| GSM4766291 | ChIP-seq_ADR_input_Flag-WT-NRF-1_R1.bw   | ChIP-seq_ADR_input_Flag-WT-NRF-1_R1.fq   |
| GSM4766292 | ChIP-seq_ADR_input_Flag-WT-NRF-1_R2.bw   | ChIP-seq_ADR_input_Flag-WT-NRF-1_R2.fq   |
| GSM4766293 | ChIP-seq_ADR_input_NRF-1_R1.bw           | ChIP-seq_ADR_input_NRF-1_R1.fq           |
| GSM4766294 | ChIP-seq_ADR_input_NRF-1_R2.bw           | ChIP-seq_ADR_input_NRF-1_R2.fq           |
| GSM4766295 | ChIP-seq_ADR_NRF-1_R1.bw                 | ChIP-seq_ADR_NRF-1_R1.fq                 |
| GSM4766296 | ChIP-seq_ADR_NRF-1_R2.bw                 | ChIP-seq_ADR_NRF-1_R2.fq                 |
| GSM4766297 | ChIP-seq_MCF-7_Flag-AA-NRF-1_R1.bw       | ChIP-seq_MCF-7_Flag-AA-NRF-1_R1.fq       |
| GSM4766298 | ChIP-seq_MCF-7_Flag-AA-NRF-1_R2.bw       | ChIP-seq_MCF-7_Flag-AA-NRF-1_R2.fq       |
| GSM4766299 | ChIP-seq_MCF-7_Flag-WT-NRF-1_R1.bw       | ChIP-seq_MCF-7_Flag-WT-NRF-1_R1.fq       |
| GSM4766300 | ChIP-seq_MCF-7_Flag-WT-NRF-1_R2.bw       | ChIP-seq_MCF-7_Flag-WT-NRF-1_R2.fq       |
| GSM4766301 | ChIP-seq_MCF-7_input_Flag-AA-NRF-1_R1.bw | ChIP-seq_MCF-7_input_Flag-AA-NRF-1_R1.fq |
| GSM4766302 | ChIP-seq_MCF-7_input_Flag-AA-NRF-1_R2.bw | ChIP-seq_MCF-7_input_Flag-AA-NRF-1_R2.fq |
| GSM4766303 | ChIP-seq_MCF-7_input_Flag-WT-NRF-1_R1.bw | ChIP-seq_MCF-7_input_Flag-WT-NRF-1_R1.fq |
| GSM4766304 | ChIP-seq_MCF-7_input_Flag-WT-NRF-1_R2.bw | ChIP-seq_MCF-7_input_Flag-WT-NRF-1_R2.fq |

|            |                                  |                                  |
|------------|----------------------------------|----------------------------------|
| GSM4766305 | ChIP-seq_MCF-7_input_NRF-1_R1.bw | ChIP-seq_MCF-7_input_NRF-1_R1.fq |
| GSM4766306 | ChIP-seq_MCF-7_input_NRF-1_R2.bw | ChIP-seq_MCF-7_input_NRF-1_R2.fq |
| GSM4766307 | ChIP-seq_MCF-7_NRF-1_R1.bw       | ChIP-seq_MCF-7_NRF-1_R1.fq       |
| GSM4766308 | ChIP-seq_MCF-7_NRF-1_R2.bw       | ChIP-seq_MCF-7_NRF-1_R2.fq       |
| GSM4766309 | Diff_RNA-seq_MCF7_ADR_R2.txt     | ADR RNA-seq-R2.fq                |
| GSM4766310 | RNA-seq_MCF7_ADR_R2.txt          | MCF7 RNA-seq-R2.fq               |
| GSM4211240 | Diff_RNA-seq_MCF7andADR.txt      | ADR RNA-seq.fq                   |
| GSM4211241 | Diff_RNA-seq_MCF7andADR.txt      | MCF-7 RNA-seq.fq                 |

Genome browser session  
(e.g. [UCSC](#))

IGV

## Methodology

### Replicates

For each experiment, 7-8 individual 10 cm dishes of MCF-7 cells or ADR cells were fixed and cell pellet were collected from each dish. The sonicated nuclear extracts were pooled and mixed well. 100 µg sonicated chromatin was used for each ChIP-seq-like experiments. sWGA lectin ChIP-seq was performed once. Two biological replicates of the RNA-seq, COGC-seq and other ChIP-seq were done.

### Sequencing depth

| Sample                                | Clean reads | Mapped reads |
|---------------------------------------|-------------|--------------|
| COGC-seq ADR Input-R1                 | 85,476,292  | 82,647,311   |
| COGC-seq ADR Input-R2                 | 89,517,052  | 85,814,079   |
| COGC-seq MCF_7 Input-R1               | 85,490,163  | 82,759,398   |
| COGC-seq MCF-7 Input-R2               | 89,516,456  | 85,790,107   |
| COGC-seq ADR-R1                       | 85,504,041  | 82,435,665   |
| COGC-seq ADR-R2                       | 89,517,550  | 85,160,863   |
| COGC-seq MCF_7-R1                     | 85,479,583  | 82,403,186   |
| COGC-seq MCF_7-R2                     | 89,485,341  | 85,527,551   |
| sWGA-ADR-Input                        | 27,264,143  | 26,520,664   |
| sWGA-MCF-7-Input                      | 27,349,146  | 26,521,728   |
| sWGA-ADR IP                           | 27,319,286  | 26,428,621   |
| sWGA-MCF-7 IP                         | 27,309,005  | 26,444,588   |
| ChIP-seq_ADR_Flag-AA-NRF-1_R1         | 21,171,628  | 20,923,792   |
| ChIP-seq_ADR_Flag-AA-NRF-1_R2         | 21,197,516  | 20,945,704   |
| ChIP-seq_ADR_Flag-WT-NRF-1_R1         | 21,172,369  | 20,852,883   |
| ChIP-seq_ADR_Flag-WT-NRF-1_R2         | 21,195,521  | 20,882,145   |
| ChIP-seq_ADR_input_Flag-AA-NRF-1_R1   | 21,150,849  | 20,873,757   |
| ChIP-seq_ADR_input_Flag-AA-NRF-1_R2   | 21,180,114  | 20,910,063   |
| ChIP-seq_ADR_input_Flag-WT-NRF-1_R1   | 21,106,090  | 20,866,375   |
| ChIP-seq_ADR_input_Flag-WT-NRF-1_R2   | 21,108,637  | 20,871,088   |
| ChIP-seq_ADR_input_NRF-1_R1           | 21,188,148  | 20,944,927   |
| ChIP-seq_ADR_input_NRF-1_R2           | 21,081,028  | 20,828,125   |
| ChIP-seq_ADR_NRF-1_R1                 | 21,163,591  | 20,837,584   |
| ChIP-seq_ADR_NRF-1_R2                 | 21,196,401  | 20,884,141   |
| ChIP-seq_MCF-7_Flag-AA-NRF-1_R1       | 21,054,482  | 20,732,598   |
| ChIP-seq_MCF-7_Flag-AA-NRF-1_R2       | 21,110,978  | 20,790,141   |
| ChIP-seq_MCF-7_Flag-WT-NRF-1_R1       | 20,980,564  | 20,606,423   |
| ChIP-seq_MCF-7_Flag-WT-NRF-1_R2       | 20,890,898  | 20,498,759   |
| ChIP-seq_MCF-7_input_Flag-AA-NRF-1_R1 | 21,160,128  | 20,772,486   |
| ChIP-seq_MCF-7_input_Flag-AA-NRF-1_R2 | 21,114,534  | 20,737,856   |
| ChIP-seq_MCF-7_input_Flag-WT-NRF-1_R1 | 21,207,904  | 20,930,831   |
| ChIP-seq_MCF-7_input_Flag-WT-NRF-1_R2 | 20,993,316  | 20,697,333   |
| ChIP-seq_MCF-7_input_NRF-1_R1         | 20,969,246  | 20,684,237   |
| ChIP-seq_MCF-7_input_NRF-1_R2         | 21,176,593  | 20,904,194   |
| ChIP-seq_MCF-7_NRF-1_R1               | 21,063,983  | 20,676,620   |
| ChIP-seq_MCF-7_NRF-1_R2               | 20,977,194  | 20,613,948   |
| ADR RNA-seq-R2                        | 23,721,397  | 22,763,053   |
| MCF-7 RNA-seq-R2                      | 23,612,257  | 22,599,291   |
| ADR RNA-seq                           | 21,682,035  | 20,339,917   |
| MCF-7 RNA-seq                         | 21,836,111  | 20,521,577   |

### Antibodies

Streptavidin-magnetic beads (BEAVER Life Science, #22308-10) was used for COGC-seq  
sWGA-agarose beads (Vector Laboratories, #AL-1023S) was used for sWGA lectin ChIP-seq  
anti-NRF1 (CST, #46743, 1:10), anti-Flag-magnetic beads (Bimake, # B26102) and protein A/G-magnetic beads (Bimake, #B23201) were used for NRF-1, Flag-WT-NRF-1 and Flag-AA-NRF-1 ChIP-seq.

Peak calling parameters

Regions enriched in ChIP-seq-like signal were identified using MACS with corresponding control and parameters -f BAM -g mm -B-p 1e-5 -m 10 30 for narrowPeak calling.

Data quality

All files past fastqc check. Data quality was assessed using MACS by comparing peak enrichment over input controls with a p cutoff value of 1e-5.

Software

FastQC (v 0.11.8);  
Samtools (v 1.2);  
Bowtie2 (v 2.3.4.3);  
Bedtools (v2.27.1);  
MACS (v 2.1.1);  
Integrative Genomics Viewer (IGV; v2.3.4)  
deeptools (v 3.3.2.0.0);  
Metascape (v 3.0);  
Cytoscape (v 3.6.1);  
MEME (v 5.0.1);  
DiffBind (v 2.10.0);  
MANorm (v 1.2.0);  
Homer (v 4.11);  
ChIPseeker (v 1.18.0);  
SOAPnuke (v 2.1.0);  
HISAT2 (v 2.1.0);  
RSEM (v 1.2.4);  
DESeq2 (v 1.18.1);  
R main package (v 3.4.3);  
R-package: venneuler (v 1.1-0);  
R-package: beanplot (v 1.2);  
R-package: ggplot2 (v 3.0.0);  
R-package: igraph (v 1.2.1).
